# Supplementary material for: Preliminary Study on Light-Activated Antimicrobial Agents as Photocatalytic Method for Protection of Surfaces with Increased Risk of Infections
Source: MDPI journal article supplement (doi:10.3390/ma14185307), 2021-09-14
Supplement: s1 [file s1]

# Preliminary Study on Light-Activated Antimicrobial Agents as Photocatalytic Method for Protection of Surfaces with Increased Risk of Infections

Razvan Bucuresteanu <sup>1,2</sup>, Lia-Mara Ditu <sup>1,2,\*</sup>, Monica Ionita <sup>3</sup>, Ioan Calinescu <sup>3</sup>, Valentin Raditoiu <sup>4</sup>, Bogdan Cojocaru <sup>5</sup>, Ludmila Otilia Cinteza <sup>6</sup>, Carmen Curutiu <sup>1,2</sup>, Alina Maria Holban <sup>1,2</sup>, Marius Enachescu <sup>7,8</sup>, Laura-Bianca Enache <sup>7</sup>, Gabriel Mustatea <sup>9</sup>, Viorel Chihaiu <sup>10</sup>, Adela Nicolaev <sup>11</sup>, Elena-Larisa Borcan <sup>11,12</sup> and Grigore Mihaescu <sup>1,2</sup>

<sup>1</sup> Department of Microbiology, Faculty of Biology, University of Bucharest, Intr. Portocalelor no 1-3, 060101 Bucharest, Romania; razvan.bucuresteanu@drd.unibuc.ro (R.B.); carmen.curutiu@bio.unibuc.ro (C.C.); alina.m.holban@bio.unibuc.ro (A.M.H.); grigore.mihaescu@bio.unibuc.ro (G.M.)

<sup>2</sup> Faculty of Biology, Research Institute, University of Bucharest, Soseaua Paduri 90-92, 50663 Bucharest, Romania

<sup>3</sup> Faculty of Applied Chemistry and Materials Science, University Politehnica of Bucharest, Splaiul Independenței no 313, 060042 Bucharest, Romania; ionita\_monica@yahoo.com (M.I.); ioan.calinescu@upb.ro (I.C.)

<sup>4</sup> Laboratory of Functional Dyes and Related Materials, National Institute for Research & Development in Chemistry and Petrochemistry—ICECHIM, 202 Splaiul Independenței, 6th District, 060021 Bucharest, Romania; vraditoiu@icechim.ro

<sup>5</sup> Department of Organic Chemistry, Biochemistry & Catalysis, Faculty of Chemistry, University of Bucharest, Bdul Regina Elisabeta 4-12, 030016 Bucharest, Romania; bogdan.cojocaru@chimie.unibuc.ro

<sup>6</sup> Department of Physical Chemistry, Faculty of Chemistry, University of Bucharest, Bdul Regina Elisabeta 4-12, 030016 Bucharest, Romania; ocinteza@gw-chimie.math.unibuc.ro

<sup>7</sup> Center for Surface Science and Nanotechnology, University POLITEHNICA of Bucharest, 313 Splaiul Independenței, 060042 Bucharest, Romania; marius.enachescu@cssnt-upb.ro (M.E.); laura.bianca@cssnt-upb.ro (L.-B.E.)

<sup>8</sup> Academy of Romanian Scientists, 54 Splaiul Independenței, 050094 Bucharest, Romania

<sup>9</sup> National R&D Institute for Food Bioresources—IBA Bucharest, 5 Ancuța Băneasa Street, 020323 Bucharest, Romania; gabi.mustatea@bioresurse.ro

<sup>10</sup> Institute of Physical Chemistry “Ilie Murgulescu”, Romanian Academy, Splaiul Independenței 202, 060021 Bucharest, Romania; vchihaia@icf.ro

<sup>11</sup> Department of Surfaces and Interfaces, National Institute of Materials Physics, Atomistilor 405A, 077125 Magurele, Romania; adela.nicolaev@infim.ro (A.N.); elena-larisa.borcan@drd.unibuc.ro (E.-L.B.)

<sup>12</sup> Faculty of Physics, University of Bucharest, Atomistilor 405, 077125 Magurele, Romania

\* Correspondence: lia-mara.ditu@bio.unibuc.ro; Tel.: +40-04-0745-67-38-22

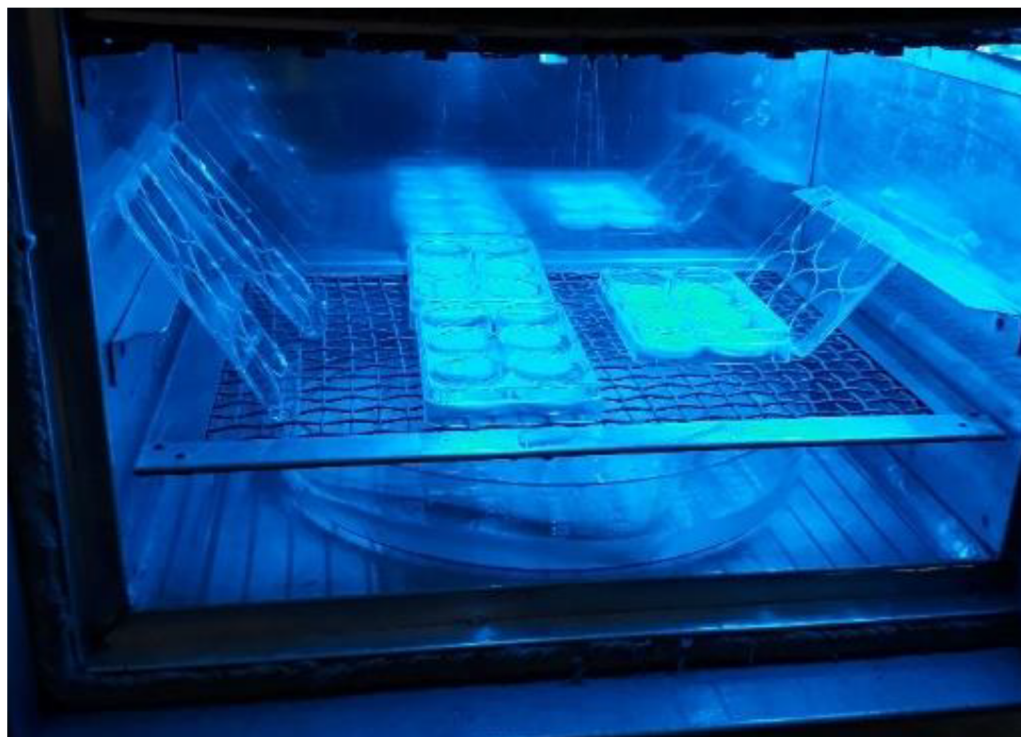

**Figure S1.** Samples exposure to blue light (470 nm) generated by a commercial light led source with 470 nm wavelength emission 11 spectrum.

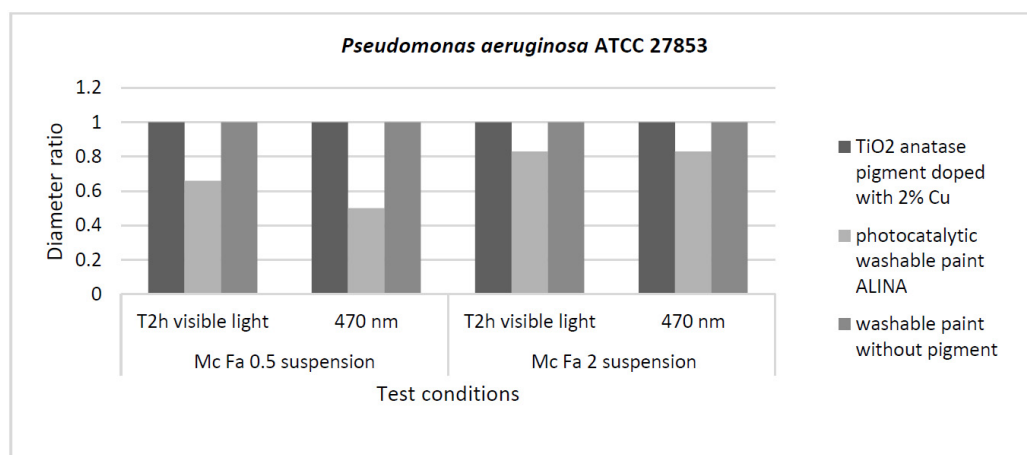

**Figure S2.** Graphic representation of inhibition zone diameters expressed as diameter ratio, obtained for *P. aeruginosa* ATCC 27853 15 after incubation in two different conditions: visible light and blue light (470 nm).

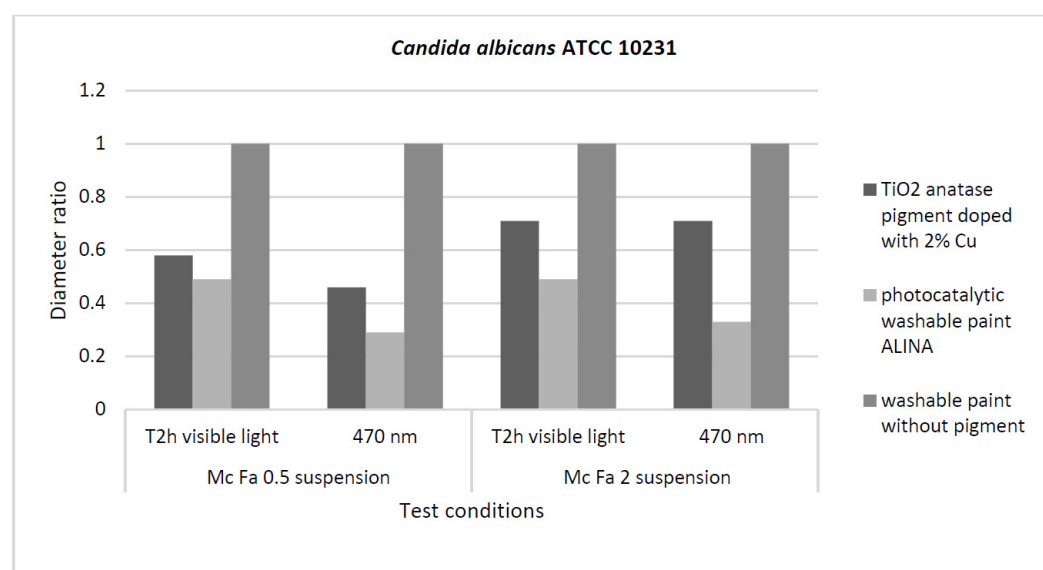

**Figure S3.** Graphic representation of inhibition zone diameters expressed as diameter ratio, obtained for *C. albicans* ATCC 10231 18 after incubation in two different conditions: visible light and blue light (470 nm).
